# Supplementary material for: Generalizability of a Diabetes-Associated Country-Specific Exploratory Dietary Pattern Is Feasible Across European Populations
Source: PubMed Central journal article supplement — J Nutr. 2019 Apr 24;149(6):1047–55. doi: 10.1093/jn/nxz031 (PMC6543295; doi:10.1093/jn/nxz031), 2019-04-24
Supplement: nxz031_supplemental_file.pdf [file nxz031_supplemental_file.pdf]

Supplementary data

1 **Supplemental Table 1 Comparison of baseline characteristics between the total subcohort and the excluded**  
 2 **participants**

| <b>Characteristics</b>                | <b>Number of<br/>excluded<br/>participants</b> | <b>Excluded participants</b> | <b>Total subcohort (<i>n</i> = 14,694)</b> |
|---------------------------------------|------------------------------------------------|------------------------------|--------------------------------------------|
| <b>Age (years)</b>                    | 2,621                                          | 49.3 ± 10.0                  | 52.9 ± 8.8                                 |
| <b>Men (%)</b>                        | 2,621                                          | 50.0                         | 37.0                                       |
| <b>BMI (kg/m<sup>2</sup>)</b>         | 2,424                                          | 26.8 ± 4.8                   | 26.1 ± 4.2                                 |
| <b>WC (cm)</b>                        |                                                |                              |                                            |
| <b>Men</b>                            | 254                                            | 98.6 ± 12.4                  | 95.2 ± 10.0                                |
| <b>Women</b>                          | 349                                            | 86.8 ± 14.6                  | 81.2 ± 11.2                                |
| <b>Physically active (%)</b>          | 2,236                                          | 16.2                         | 20.2                                       |
| <b>Never smoking (%)</b>              | 2,621                                          | 47.2                         | 45.9                                       |
| <b>Post-secondary education (%)</b>   | 2,291                                          | 15.8                         | 20.6                                       |
| <b>Family History of Diabetes (%)</b> | 2,191                                          | 23.1                         | 19.2                                       |
| <b>HbA1c ≥ 6.5%</b>                   | 2,338                                          | 5.9                          | 1.6                                        |
| <b>Total energy intake (kcal)</b>     | 2,504                                          | 1,864 (1,448 – 2,350)        | 2,074 (1,692 -2,538)                       |

3 Data were shown as mean ± standard deviation, median (interquartile range) or as relative percentages.

Supplementary data

4 **Supplemental Table 2 Definition and content of the 39 food groups, developed to be used for dietary pattern**  
 5 **analyses by the EPIC-InterAct consortium**

| <b>Food group</b>              | <b>Definition and content</b>                                                                                                                                                                                                           |
|--------------------------------|-----------------------------------------------------------------------------------------------------------------------------------------------------------------------------------------------------------------------------------------|
| <b>Potatoes</b>                | potatoes and potato products incl. French fries; other tubers e.g. sweet potato;                                                                                                                                                        |
| <b>Leafy vegetables</b>        | e.g. lettuce; spinach; Swiss chard leaf; watercress                                                                                                                                                                                     |
| <b>Fruiting vegetables</b>     | e.g. tomato; tomato puree; sweet pepper n.s.; avocado; eggplant; artichoke; okra, green beans; squash; cucumber; gherkins; capers                                                                                                       |
| <b>Root vegetables</b>         | e.g. carrot; celeriac; radish; turnip; salsify; parsnip; beetroot                                                                                                                                                                       |
| <b>Cabbage</b>                 | e.g. broccoli/cauliflower; sauerkraut; green cabbage; Brussels sprouts                                                                                                                                                                  |
| <b>Other vegetables</b>        | e.g. mushrooms ; grain and pod vegetables; onion, garlic; stalk vegetables; sprouts; mixed salad, mixed vegetables                                                                                                                      |
| <b>Legumes</b>                 | e.g. red kidney beans; haricot beans; chickpeas; split peas; lentils                                                                                                                                                                    |
| <b>Fruits</b>                  | All kinds of fruits incl. orange; grapefruit; lemon; apple; pear; grape; raisins; apricot; peach; nectarine; plum; mirabelle; cherry<br>strawberry; raspberry; redcurrant; blackberry; banana; banana chips; kiwi                       |
| <b>Nuts</b>                    | e.g. walnut; hazelnut; hazelnut paste; almond; cashew nut; pecan nut; pistachio; paranut=brasilnut; macadamia; pine nut; peanuts; peanut butter; coated peanuts; pumpkin; poppy; sesame, sunflower; flaxseed; tahini; coconut; chestnut |
| <b>Other fruits</b>            | e.g. mixed fruits; olives                                                                                                                                                                                                               |
| <b>Milk and dairy products</b> | milk and milk beverages; yoghurt; fromage blanc; cream desserts, puddings (milk based); dairy creams; milk for coffee and creamers; fermented milk beverages;                                                                           |
| <b>Cheese</b>                  | Cheese (incl. fresh cheese)                                                                                                                                                                                                             |
| <b>Pasta, rice</b>             | e.g. pasta, rice (white and brown), other grains                                                                                                                                                                                        |
| <b>Bread</b>                   | bread, crispbread, rusks                                                                                                                                                                                                                |
| <b>other cereals</b>           | flour, flakes, starches, semolina; breakfast cereals; salty biscuits, aperitif biscuits, crackers; dough and pastry                                                                                                                     |
| <b>Red meat</b>                | e.g. beef; veal; pork; mutton/lamb; horse; goat                                                                                                                                                                                         |
| <b>Poultry</b>                 | e.g. chicken, hen; turkey; duck; goose; domestic rabbit                                                                                                                                                                                 |

## Supplementary data

---

|                                   |                                                                                                                                      |
|-----------------------------------|--------------------------------------------------------------------------------------------------------------------------------------|
| <b>Processed meat</b>             | e.g. bacon; ham; liver pate; hamburger; meatballs; minced meat; other processed meat (sausages, chorizo, black pudding, corned beef) |
| <b>Offals</b>                     | e.g. liver, kidney; tripe; tongue; heart; sweetbread                                                                                 |
| <b>Fish</b>                       | Fish incl. fish products, crustaceans and molluscs                                                                                   |
| <b>Eggs</b>                       | Eggs and egg products                                                                                                                |
| <b>Vegetable oils</b>             | e.g. olive oil; soya oil; sunflower oil; peanut oil; corn/maize oil; grape oil; rapeseed oil; safflower oil; walnut oil              |
| <b>Margarine</b>                  | margarine                                                                                                                            |
| <b>Butter</b>                     | butter                                                                                                                               |
| <b>Other fats</b>                 | deep frying fats ; other animal fat e.g. dripping fat; pork fat; duck fat; goose fat                                                 |
| <b>Sugar</b>                      | e.g. honey; jam; chocolate; non-chocolate confectionary; ice cream                                                                   |
| <b>Cake, cookies</b>              | croissant; brioche; fruit pie; meringue; pancake; chocolate cake; fruit cake; bun stuffed with cream                                 |
| <b>Fruit and vegetable juice</b>  | apple/orange/passion-fruit juice; citrus juice ; vegetable juice e.g. carrot juice; tomato juice                                     |
| <b>Softdrinks</b>                 | carbonated/soft/isotonic drinks, diluted syrups                                                                                      |
| <b>Coffee</b>                     | Coffee                                                                                                                               |
| <b>Tea</b>                        | e.g. black and green tea                                                                                                             |
| <b>Other non-alcoholic drinks</b> | herbal tea; chicory, substitutes; waters                                                                                             |
| <b>Wine</b>                       | red, white and rose wine                                                                                                             |
| <b>Beer</b>                       | Beer, cider                                                                                                                          |
| <b>Spirits</b>                    | whisky; cognac; grappa; gin; klarer; vodka; rum; brandy                                                                              |
| <b>Other alcoholic beverages</b>  | fortified wines (e.g. sherry; martini; vermouth; port wine; Campari); aniseed drinks; liqueurs ; cocktails, punches                  |
| <b>Sauces</b>                     | sauces                                                                                                                               |
| <b>Soups</b>                      | soups, bouillons                                                                                                                     |
| <b>Miscellaneous</b>              | yeasts; spices and herbs; condiments; miscellaneous                                                                                  |

---

## Supplementary data

7 **Supplemental Table 3 Country-specific intake of the food groups (g/day) in the EPIC-InterAct subcohort (n = 14,694)**

|                                     | France<br>(n = 562)         | Italy<br>(n = 1,927)        | Spain<br>(n = 3,509)        | UK-Norfolk<br>(n = 900)     | UK-Oxford<br>(n = 316)     | Netherlands<br>(n = 1,398) | Germany<br>(n = 2,044)      | Sweden<br>(n = 1,919)       | Denmark<br>(n = 2,119)      |
|-------------------------------------|-----------------------------|-----------------------------|-----------------------------|-----------------------------|----------------------------|----------------------------|-----------------------------|-----------------------------|-----------------------------|
| <b>Dietary intake</b>               |                             |                             |                             |                             |                            |                            |                             |                             |                             |
| <b>Total energy<br/>(kJ/day)</b>    | 8,829<br>(7,430-<br>10,531) | 9,423<br>(7,594-<br>11,514) | 8,626<br>(6,987-<br>10,874) | 8,202<br>(6,636-<br>10,109) | 8,015<br>(6,586-<br>9,627) | 7,902<br>(6,577-9,433)     | 8,130<br>(6,607-<br>10,100) | 8,943<br>(7,473-<br>10,770) | 9,116<br>(7,552-<br>10,895) |
| <b>Fat (%<br/>energy)</b>           | 36.5<br>(32.8 – 40.5)       | 33.9<br>(30.3 –<br>37.7)    | 35.6<br>(31.6 –<br>39.6)    | 34.0<br>(30.5 –<br>37.5)    | 32.8<br>(28.5 – 37.5)      | 34.1<br>(30.8 – 37.6)      | 35.4<br>(31.3 –<br>39.0)    | 36.9<br>(33.3 –<br>40.8)    | 33.6<br>(29.7 –<br>37.1)    |
| <b>Carbohydrates<br/>(% energy)</b> | 42.1<br>(37.1 –<br>47.0)    | 45.1<br>(40.5 –<br>49.7)    | 41.3<br>(36.4 –<br>45.9)    | 45.9<br>(41.8 –<br>50.0)    | 47.3<br>(42.5 – 51.7)      | 44.9<br>(40.7 – 48.9)      | 44.3<br>(39.9 –<br>49.0)    | 44.0<br>(39.8 – 48.2)       | 42.6<br>(38.3 – 47.2)       |
| <b>Protein (%<br/>energy)</b>       | 17.3<br>(15.7 –<br>19.1)    | 16.7<br>(15.2 –<br>18.3)    | 19.1<br>(17.5 –<br>21.1)    | 17.3<br>(15.2 –<br>19.5)    | 15.7<br>(13.9 – 18.1)      | 17.3<br>(15.5 – 19.1)      | 14.8<br>(13.3 –<br>16.5)    | 15.3<br>(13.8 –<br>16.8)    | 17.2<br>(15.5 –<br>18.9)    |
| <b>Food group</b>                   |                             |                             |                             |                             |                            |                            |                             |                             |                             |
| <b>Potatoes</b>                     | 57.1<br>(31.4 -85.7 )       | 21.6<br>(11.5 – 37.6)       | 70.7<br>(44.0 – 107)        | 115<br>(71.4 – 141)         | 71.4<br>(56.1 – 115)       | 79.2<br>(49.6 – 128)       | 83.4<br>(56.4 – 117)        | 109<br>(70.3 – 155)         | 134<br>(89.1 – 195)         |
| <b>Leafy<br/>vegetables</b>         | 65.7<br>(41.0 -90.4 )       | 26.7<br>(15.8 – 43.9)       | 53.7<br>(25.7 – 96.0)       | 4.7<br>(1.5 – 10.0)         | 10.2<br>(5.6 – 16.5)       | 23.4<br>(13.8 – 35.1)      | 8.6<br>(4.5 – 14.4)         | 10.3<br>(2.4 – 23.0)        | 1.0<br>(0.4 – 2.1)          |
| <b>Fruiting<br/>vegetables</b>      | 62.1<br>(18.1 - 106)        | 69.2<br>(44.5 – 103)        | 87.2<br>(48.3 – 139)        | 47.7<br>(30.6 – 70.1)       | 62.6<br>(40.8 – 90.5)      | 38.2<br>(27.4 – 52.7)      | 49.8<br>(34.4 – 71.2)       | 56.0<br>(29.1 – 95.4)       | 28.6<br>(18.1 – 42.4)       |
| <b>Root<br/>vegetables</b>          | 26.6<br>(6.0 - 44.3)        | 9.0<br>(2.9 – 20.6)         | 3.7<br>(1.3 – 8.1)          | 40.3<br>(23.3 – 63.1)       | 40.3<br>(20.9 – 63.0)      | 17.6<br>(9.5 – 27.9)       | 10.7<br>(6.6 – 16.6)        | 17.6<br>(5.3 – 37.1)        | 13.0<br>(5.0 – 37.8)        |
| <b>Cabbage</b>                      | 17.3<br>(0.0 - 34.0)        | 4.0<br>(1.5 – 8.8)          | 1.4<br>(0.0 – 9.5)          | 65.3<br>(39.0 – 107)        | 49.7<br>(32.2 – 83.8)      | 19.9<br>(12.0 – 30.1)      | 12.7<br>(7.5 – 21.1)        | 2.3<br>(0.0 – 19.1)         | 11.8<br>(5.6 – 19.9)        |

Supplementary data

|                         |                       |                       |                       |                       |                       |                       |                       |                       |                       |
|-------------------------|-----------------------|-----------------------|-----------------------|-----------------------|-----------------------|-----------------------|-----------------------|-----------------------|-----------------------|
| <b>Other vegetables</b> | 49.4<br>(31.9 - 93.1) | 30.6<br>(19.2 - 48.5) | 41.7<br>(23.0 - 74.1) | 59.0<br>(42.4 - 81.8) | 68.6<br>(50.6 - 96.2) | 16.5<br>(9.8 - 25.8)  | 24<br>(16.5 - 33.5)   | 21.2<br>(10.2 - 35.3) | 88.6<br>(51.7 - 135)  |
| <b>Legumes</b>          | 13.1<br>(3.3 - 28.6)  | 5.4<br>(2.0 - 11.6)   | 45.1<br>(25.4 - 71.0) | 11.3<br>(5.7 - 16.2)  | 12.3<br>(6.5 - 35.8)  | 7.1<br>(2.5 - 13.4)   | 2.0<br>(0.8 - 4.9)    | 0.0<br>(0.0 - 0.0)    | 0.3<br>(0.0 - 1.5)    |
| <b>Fruits</b>           | 239<br>(150 - 332)    | 300<br>(205 - 418)    | 275<br>(156 - 438)    | 190<br>(115 - 297)    | 234<br>(145 - 358)    | 188<br>(118 - 271)    | 106<br>(79.9 - 184)   | 160<br>(99.5 - 248)   | 144<br>(71.1 - 243)   |
| <b>Nuts</b>             | 3.0<br>(0.0 - 7.9)    | 0.2<br>(0.2 - 1.0)    | 0<br>(0.0 - 3.0)      | 0<br>(0.0 - 2.1)      | 3.0<br>(0.5 - 11.4)   | 4.2<br>(1.4 - 10.7)   | 0.9<br>(0.3 - 3.5)    | 0<br>(0.0 - 1.5)      | 0.8<br>(0.8 - 1.6)    |
| <b>Other fruits</b>     | 0<br>(0.0 - 1.6)      | 2.3<br>(0.5 - 14.0)   | 0<br>(0.0 - 3.6)      | 0<br>(0.0 - 0.0)      | 0<br>(0.0 - 0.0)      | 0<br>(0.0 - 0.1)      | 2.0<br>(0.9 - 3.8)    | 0<br>(0.0 - 0.0)      | 0<br>(0.0 - 0.0)      |
| <b>Milk and dairy</b>   | 211<br>(121 - 337)    | 143<br>(27.4 - 224)   | 244<br>(150 - 366)    | 385<br>(300 - 553)    | 347<br>(177 - 491)    | 366<br>(213 - 546)    | 160<br>(82.3 - 277)   | 313<br>(175 - 499)    | 253<br>(117 - 540)    |
| <b>Cheese</b>           | 50.3<br>(29.9 - 81.2) | 58.4<br>(36.1 - 87.1) | 14.3<br>(0.7 - 42.0)  | 14.6<br>(5.0 - 18.6)  | 16.6<br>(6.4 - 20.8)  | 30.9<br>(20.1 - 46.8) | 31.4<br>(16.8 - 40.1) | 35.1<br>(20.0 - 54.7) | 25.7<br>(17.5 - 52.7) |
| <b>Pasta and Rice</b>   | 66.2<br>(38.8 - 101)  | 136<br>(82.0 - 207)   | 56.8<br>(36.4 - 79.4) | 24.4<br>(10.5 - 45.4) | 55.0<br>(35.0 - 92.3) | 31.0<br>(13.2 - 54.3) | 20.4<br>(10.5 - 34.7) | 25.0<br>(0.0 - 50.0)  | 35.7<br>(20.6 - 60.4) |
| <b>Bread</b>            | 109<br>(70.0 - 164)   | 140<br>(97.8 - 207)   | 131<br>(83.4 - 192)   | 78.7<br>(39.3 - 114)  | 83.5<br>(37.7 - 118)  | 118<br>(87.4 - 154)   | 150<br>(99.0 - 199)   | 103<br>(71.3 - 147)   | 141<br>(103 - 188)    |
| <b>Other cereal</b>     | 6.7<br>(3.2 - 13.2)   | 13.5<br>(7.1 - 21.6)  | 0<br>(0.0 - 2.0)      | 32.3<br>(19.3 - 60.0) | 50.4<br>(31.0 - 72.1) | 6.7<br>(2.1 - 15.9)   | 5.9<br>(2.3 - 14.6)   | 16.7<br>(5.1 - 49.5)  | 9.7<br>(5.8 - 29.5)   |
| <b>Red meat</b>         | 45.2<br>(19.1 - 71.2) | 44.3<br>(25.7 - 65.0) | 36.5<br>(17.9 - 60.5) | 33.6<br>(24.2 - 65.6) | 10.7<br>(1.4 - 33.1)  | 54.1<br>(31.9 - 80.4) | 24.5<br>(14.6 - 38.8) | 33.2<br>(17.7 - 51.6) | 72.9<br>(51.7 - 98.8) |
| <b>Poultry</b>          | 17.2<br>(3.4 - 30.0)  | 22.3<br>(12.3 - 34.6) | 30.7<br>(17.4 - 50.1) | 16.1<br>(8.1 - 49.5)  | 8.2<br>(0.0 - 49.3)   | 8.7<br>(3.8 - 15.5)   | 8.7<br>(4.5 - 16.4)   | 1.9<br>(0.0 - 19.6)   | 17.6<br>(10.6 - 26.8) |
| <b>Processed meat</b>   | 26.3<br>(14.6 - 40.4) | 18.9<br>(10.7 - 31.7) | 29.9<br>(14.3 - 52.8) | 20.9<br>(12.6 - 34.2) | 8.1<br>(1.0 - 20.0)   | 19.9<br>(9.8 - 25.8)  | 53.0<br>(30.8 - 80.2) | 38.7<br>(21.5 - 62.2) | 25.0<br>(14.2 - 40.8) |
| <b>Offals</b>           | 2.6<br>(0.0 - 9.2)    | 2.0<br>(0.4 - 4.3)    | 0<br>(0.0 - 0.0)      | 0<br>(0.0 - 3.9)      | 0.6<br>(0.0 - 0.6)    | 0<br>(0.0 - 0.8)      | 0.8<br>(0.0 - 1.8)    | 0<br>(0.0 - 0.0)      | 2.9<br>(0.4 - 5.5)    |
| <b>Fish</b>             | 31.0<br>(18.6 - 47.3) | 24.2<br>(13.7 - 40.2) | 54.8<br>(34.0 - 81.4) | 32.2<br>(20.2 - 46.5) | 26.1<br>(0.0 - 40.3)  | 8.8<br>(3.6 - 16.3)   | 16.4<br>(9.0 - 29.0)  | 36.8<br>(19.5 - 56.9) | 39.6<br>(25.3 - 57.4) |
| <b>Eggs</b>             | 21.0<br>(11.3 - 32.3) | 14.9<br>(8.0 - 21.9)  | 21.6<br>(11.8 - 34.9) | 7.0<br>(4.2 - 21.5)   | 7.4<br>(3.8 - 21.6)   | 14.3<br>(7.5 - 21.5)  | 12.8<br>(6.4 - 19.9)  | 16.2<br>(7.5 - 26.6)  | 17.4<br>(10.4 - 33.9) |

Supplementary data

|                             |                       |                       |                       |                       |                       |                       |                       |                       |                       |
|-----------------------------|-----------------------|-----------------------|-----------------------|-----------------------|-----------------------|-----------------------|-----------------------|-----------------------|-----------------------|
| <b>Vegetable oils</b>       | 5.8<br>(3.3 - 8.0)    | 28.9<br>(21.7 - 37.9) | 25.7<br>(18.0 - 35.5) | 3.6<br>(1.8 - 5.7)    | 2.3<br>(1.2 - 3.7)    | 2.5<br>(0.5 - 5.1)    | 4.5<br>(2.6 - 6.9)    | 0<br>(0.0 - 2.0)      | 0.5<br>(0.2 - 4.7)    |
| <b>Margarine</b>            | 0<br>(0.0 - 3.6)      | 0.2<br>(0.0 - 0.4)    | 0<br>(0.0 - 0.6)      | 10.0<br>(4.3 - 25.0)  | 9.6<br>(1.1 - 25.4)   | 12.3<br>(5.2 - 20.3)  | 6.1<br>(1.3 - 20.5)   | 31.0<br>(17.3 - 45.8) | 16.7<br>(5.4 - 29.3)  |
| <b>Butter</b>               | 4.2<br>(0.4 - 10.9)   | 0.6<br>(0.1 - 2.0)    | 0<br>(0.0 - 0.0)      | 0.1<br>(0.0 - 4.4)    | 0.4<br>(0.1 - 4.4)    | 2.6<br>(1.4 - 5.2)    | 4.7<br>(0.9 - 11.4)   | 0<br>(0.0 - 0.0)      | 0<br>(0.0 - 0.0)      |
| <b>Other fats</b>           | 0<br>(0.0 - 0.0)      | 1.0<br>(0.1 - 2.3)    | 0<br>(0.0 - 0.0)      | 0<br>(0.0 - 3.9)      | 0<br>(0.0 - 0.0)      | 1.8<br>(0.7 - 4.1)    | 0.7<br>(0.2 - 1.7)    | 0.7<br>(0.1 - 1.8)    | 0.1<br>(0.1 - 0.2)    |
| <b>Sugar</b>                | 35.1<br>(15.0 - 59.5) | 33.6<br>(19.6 - 53.0) | 18.6<br>(7.3 - 32.0)  | 45.6<br>(21.7 - 73.9) | 28.5<br>(15.4 - 53.1) | 35.5<br>(20.3 - 55.0) | 27.0<br>(14.6 - 46.8) | 42.5<br>(24.3 - 68.0) | 53.8<br>(30.7 - 96.0) |
| <b>Cake and cookies</b>     | 28.5<br>(13.7 - 54.6) | 34.2<br>(15.0 - 64.2) | 20.0<br>(0.0 - 53.4)  | 47.5<br>(24.3 - 92.5) | 42.0<br>(22.5 - 73.1) | 26.6<br>(13.3 - 44.0) | 46.5<br>(22.6 - 78.3) | 39.0<br>(19.9 - 65.4) | 13.2<br>(5.9 - 26.4)  |
| <b>Fruit juice</b>          | 20.6<br>(0.0 - 94.9)  | 10.1<br>(0.0 - 38.2)  | 0.6<br>(0.0 - 6.2)    | 16.8<br>(0.0 - 94.8)  | 51.4<br>(8.6 - 120)   | 55.4<br>(9.6 - 137)   | 112<br>(36.2 - 236)   | 0.5<br>(0.0 - 100)    | 8.3<br>(1.7 - 43.0)   |
| <b>Soft drinks</b>          | 0<br>(0.0 - 0.0)      | 0<br>(0.0 - 28.6)     | 0<br>(0.0 - 0.0)      | 31.5<br>(0.0 - 158)   | 31.1<br>(6.5 - 121)   | 58.2<br>(10.7 - 139)  | 1.9<br>(0.0 - 29.1)   | 21.4<br>(0.0 - 114)   | 16.4<br>(0.0 - 89.0)  |
| <b>Coffee</b>               | 245<br>(70.0 - 400)   | 90<br>(60.0 - 127)    | 100<br>(15.1 - 182)   | 475<br>(81.7 - 475)   | 477<br>(83.3 - 502)   | 500<br>(375 - 750)    | 392<br>(261 - 580)    | 450<br>(250 - 675)    | 900<br>(500 - 1300)   |
| <b>Tea</b>                  | 57.1<br>(0.0 - 335)   | 5.0<br>(0.0 - 42.9)   | 0<br>(0.0 - 0.0)      | 855<br>(475 - 855)    | 475<br>(190 - 855)    | 238<br>(67.8 - 430)   | 23.9<br>(2.2 - 150)   | 0<br>(0.0 - 0.0)      | 85.7<br>(3.3 - 500)   |
| <b>Other non-alc.drinks</b> | 766<br>(434 - 1079)   | 0<br>(0.0 - 0.0)      | 0<br>(0.0 - 0.0)      | 0<br>(0.0 - 0.7)      | 0.1<br>(0.1 - 0.7)    | 362<br>(185 - 615)    | 523<br>(255 - 891)    | 600<br>(288 - 1017)   | 541<br>(235 - 938)    |
| <b>Wine</b>                 | 36.2<br>(1.6 - 129)   | 35.7<br>(0.0 - 250)   | 2.6<br>(0.0 - 150)    | 8.8<br>(0.0 - 53.8)   | 17.9<br>(8.9 - 53.6)  | 10.7<br>(0.0 - 57.1)  | 37.0<br>(7.4 - 92.0)  | 13.5<br>(0.0 - 53.6)  | 53.6<br>(10.3 - 98.2) |
| <b>Beer</b>                 | 0<br>(0.0 - 14.9)     | 5.5<br>(0.0 - 11.0)   | 0<br>(0.0 - 24.6)     | 0<br>(0.0 - 38.5)     | 19.6<br>(2.8 - 39.3)  | 0<br>(0.0 - 6.6)      | 41.1<br>(4.1 - 180)   | 85.7<br>(0.0 - 194)   | 94.3<br>(21.7 - 283)  |
| <b>Spirits</b>              | 0<br>(0.0 - 0.1)      | 0<br>(0.0 - 0.7)      | 0<br>(0.0 - 0.0)      | 0<br>(0.0 - 3.2)      | 0.2<br>(0.2 - 3.3)    | 0<br>(0.0 - 1.7)      | 0.3<br>(0.0 - 1.5)    | 0<br>(0.0 - 7.1)      | 2.5<br>(0.5 - 4.3)    |
| <b>Other alc.drinks</b>     | 4.6<br>(0.0 - 14.8)   | 0.7<br>(0.0 - 1.3)    | 0<br>(0.0 - 0.0)      | 0<br>(0.0 - 3.5)      | 0.5<br>(0.5 - 3.6)    | 0<br>(0.0 - 5.0)      | 0.4<br>(0.0 - 1.0)    | 1.8<br>(0.0 - 14.3)   | 1.0<br>(0.0 - 2.0)    |

8 The intake of the total energy, macronutrients and the food groups (gram/day) is shown as median (interquartile range).

Supplementary data

- 9 **Supplemental Table 4 Factor loadings\* of the 36 food groups on the two retained principal components per each country**

## Supplementary data

|                                                   | France |     | Italy |     | Spain |     | UK-Norfolk |     | UK-Oxford |     | Netherlands |     | Germany |     | Sweden |     | Denmark |     |
|---------------------------------------------------|--------|-----|-------|-----|-------|-----|------------|-----|-----------|-----|-------------|-----|---------|-----|--------|-----|---------|-----|
|                                                   | C1     | C2  | C1    | C2  | C1    | C2  | C1         | C2  | C1        | C2  | C1          | C2  | C1      | C2  | C1     | C2  | C1      | C2  |
| <b>Explained proportion of total variance (%)</b> | 10.3   | 8.3 | 11.1  | 7.2 | 9.7   | 6.1 | 8.9        | 7.5 | 11.9      | 8.1 | 10          | 7.5 | 9.2     | 7.8 | 7.5    | 6.7 | 10.3    | 8.3 |
| <b>Potatoes</b>                                   | 2      | 20  | 31    | 39  | 57    | 15  | -1         | 48  | 18        | 50  | 63          | 6   | 10      | 54  | 56     | 19  | 1       | 46  |
| <b>Leafy vegetables</b>                           | 76     | -8  | 59    | 1   | 24    | 40  | 62         | -21 | 71        | -10 | -15         | -4  | 71      | -14 | -32    | 36  | 45      | -4  |
| <b>Fruiting vegetables</b>                        | 86     | -14 | 64    | 2   | 12    | 59  | 77         | -9  | 73        | -8  | -39         | 47  | 63      | 0   | -21    | 37  | 68      | 9   |
| <b>Root vegetables</b>                            | 86     | -18 | 32    | 0   | -3    | 45  | 57         | 24  | 67        | 9   | -24         | -3  | 59      | -9  | -15    | 5   | 43      | -23 |
| <b>Cabbage</b>                                    | 82     | -5  | 58    | -18 | -3    | 9   | 56         | 31  | 54        | 20  | -18         | 9   | 37      | 20  | -9     | 14  | 53      | -5  |
| <b>Other vegetables</b>                           | -51    | 21  | 71    | -7  | 18    | 51  | 74         | 9   | 79        | -9  | -6          | 37  | 57      | 25  | -12    | 39  | 73      | 4   |
| <b>Legumes</b>                                    | 12     | 22  | 56    | -15 | 54    | -3  | 30         | 17  | 48        | -17 | 5           | 17  | 12      | 31  | 17     | -1  | 51      | -13 |
| <b>Fruits</b>                                     | 24     | -17 | 36    | -7  | -9    | 34  | 42         | -8  | 53        | -2  | -36         | 4   | 46      | -12 | -31    | 1   | 43      | -14 |
| <b>Nuts</b>                                       | 9      | 47  | 30    | 2   | 7     | 38  | 16         | 0   | 36        | -20 | 6           | 33  | 25      | 10  | 5      | 24  | 18      | 9   |
| <b>Other fruits</b>                               | 2      | 40  | 5     | 18  | 7     | 47  | 0          | 0   | 0         | 0   | 3           | 57  | 25      | 25  | -3     | -17 | 0       | 0   |
| <b>Milk &amp; dairy</b>                           | 8      | 5   | 8     | 7   | -19   | -8  | 2          | 24  | -19       | 35  | 4           | 8   | 26      | -11 | 11     | -14 | 10      | 15  |



Supplementary data

|                           |    |     |    |    |     |     |     |     |     |     |     |     |    |    |     |     |     |    |
|---------------------------|----|-----|----|----|-----|-----|-----|-----|-----|-----|-----|-----|----|----|-----|-----|-----|----|
| <b>Cheese</b>             | -2 | 18  | 39 | 29 | 0   | 35  | 14  | 19  | 0   | 12  | 15  | 22  | 16 | 13 | 9   | 19  | 24  | 9  |
| <b>Pasta &amp; rice</b>   | -1 | 36  | 16 | 47 | 30  | 24  | 50  | -29 | 26  | -15 | 9   | 58  | 19 | 10 | -14 | 27  | 41  | 12 |
| <b>Bread</b>              | -8 | 21  | 16 | 19 | 57  | -3  | 7   | 38  | 25  | 8   | 58  | 15  | 4  | 34 | 55  | -4  | 12  | 41 |
| <b>Other cereals</b>      | -1 | 15  | 37 | 5  | -1  | 24  | 12  | 24  | 19  | 21  | -4  | 54  | 26 | -2 | -2  | -8  | 27  | 7  |
| <b>Red meat</b>           | 48 | 17  | 7  | 63 | 58  | -20 | 8   | 32  | -24 | 73  | 42  | 10  | 12 | 68 | 38  | 27  | 14  | 70 |
| <b>Poultry</b>            | 40 | 13  | 25 | 26 | 26  | 6   | 26  | 5   | -25 | 54  | 3   | 40  | 17 | 48 | -3  | 30  | 44  | 18 |
| <b>Processed meat</b>     | 13 | 59  | 7  | 56 | 50  | -5  | -1  | 47  | -15 | 69  | 59  | 15  | -4 | 65 | 59  | 8   | -11 | 73 |
| <b>Offals</b>             | 28 | 29  | 9  | 32 | 27  | 1   | 17  | 18  | -9  | 53  | 5   | 31  | -1 | 43 | 9   | 1   | 15  | 44 |
| <b>Fish</b>               | 16 | 50  | 48 | 6  | 27  | 30  | 39  | 11  | -11 | 55  | -17 | 37  | 24 | 27 | 9   | 27  | 47  | 39 |
| <b>Eggs</b>               | 1  | 46  | 26 | 36 | 51  | -16 | 15  | 32  | 12  | 24  | 21  | 20  | -6 | 33 | 24  | 28  | 15  | 38 |
| <b>Vegetable oils</b>     | 0  | 36  | 73 | 25 | 70  | 29  | -12 | 51  | -14 | 58  | -26 | 55  | 73 | -5 | 5   | 31  | 53  | 5  |
| <b>Margarine</b>          | 11 | 12  | 25 | 3  | -10 | 0   | 2   | 38  | 22  | 12  | 64  | -16 | -4 | 26 | 62  | -6  | -19 | 54 |
| <b>Butter</b>             | 3  | 23  | -3 | 32 | -4  | -1  | -3  | 11  | 11  | 27  | 27  | 16  | -2 | 12 | 4   | 8   | 9   | -1 |
| <b>Other fats</b>         | 8  | -23 | 4  | 55 | 2   | 17  | 0   | 0   | 0   | 0   | 54  | 46  | 9  | 40 | 32  | 6   | -11 | 20 |
| <b>Sugar</b>              | 8  | 18  | 0  | 43 | 14  | -1  | -4  | 49  | -6  | 35  | 49  | 8   | 12 | 22 | 42  | -8  | -5  | 33 |
| <b>Cake &amp; cookies</b> | 0  | 40  | 14 | 22 | -6  | 5   | 1   | 59  | 0   | 35  | 9   | 0   | 12 | 20 | 14  | -17 | -6  | 22 |
| <b>Fruit juice</b>        | 3  | 31  | 9  | 15 | -7  | 15  | 20  | -11 | 31  | 0   | -4  | 25  | 12 | 1  | -11 | 12  | 21  | -1 |
| <b>Soft drinks</b>        | 24 | 17  | -8 | 27 | 16  | -11 | 1   | 5   | -10 | 9   | 22  | 35  | -5 | 19 | 22  | -7  | 5   | 21 |

Supplementary data

|                                      |    |     |    |    |     |     |    |     |     |    |     |     |     |     |     |    |     |     |
|--------------------------------------|----|-----|----|----|-----|-----|----|-----|-----|----|-----|-----|-----|-----|-----|----|-----|-----|
| <b>Coffee</b>                        | -2 | 41  | -7 | 28 | 3   | -25 | 1  | -21 | -25 | 15 | 33  | -10 | 0   | 21  | 27  | 9  | -23 | 29  |
| <b>Tea</b>                           | -6 | -12 | 1  | -1 | -8  | 15  | -7 | 44  | 2   | 36 | -29 | -6  | 17  | -5  | 0   | -1 | 31  | -23 |
| <b>Other non-alcoholic beverages</b> | 11 | 27  | 0  | -4 | -16 | 28  | 31 | -8  | 9   | 19 | -31 | 18  | 29  | -19 | -42 | 9  | 28  | -26 |
| <b>Wine</b>                          | -4 | 34  | -9 | 38 | 58  | -15 | 16 | -25 | 7   | 0  | -22 | 14  | 7   | 2   | -11 | 71 | 19  | -5  |
| <b>Beer</b>                          | -6 | 26  | 0  | 19 | 19  | 14  | 0  | 4   | -12 | -4 | 38  | 22  | -17 | 45  | 31  | 29 | -18 | 38  |
| <b>Spirits</b>                       | -7 | 29  | -9 | 35 | 40  | -9  | 0  | 0   | -13 | 10 | 4   | 6   | -11 | 31  | 27  | 31 | 8   | 19  |
| <b>Other alcoholic beverages</b>     | 9  | 40  | -9 | 26 | 22  | -7  | 12 | -10 | 1   | 11 | -15 | -1  | -4  | 11  | -11 | 71 | 12  | 2   |

10 \*Factor loadings are shown multiplied by 100. C1 = Component 1. C2 = Component 2.

Supplementary data

**Supplemental Table 5 Overview of the impact of different cut-off levels for factor loadings on the component structure of the simplified sum scores and their correlation with the originally derived pattern scores**

| Cut-off for factor loadings | ≥ 0.4    |          | ≥ 0.3    |          | ≥ 0.2    |          | ≥ 0.1    |          |
|-----------------------------|----------|----------|----------|----------|----------|----------|----------|----------|
|                             | <i>n</i> | <i>r</i> | <i>n</i> | <i>r</i> | <i>n</i> | <i>r</i> | <i>n</i> | <i>r</i> |
| <b>Simple France</b>        | 8        | 0.59     | 12       | 0.69     | 22       | 0.67     | 33       | 0.69     |
| <b>Simple Spain</b>         | 9        | 0.90     | 10       | 0.91     | 15       | 0.93     | 23       | 0.82     |
| <b>Simple UK-Norfolk</b>    | 6        | 0.67     | 11       | 0.72     | 18       | 0.66     | 24       | 0.67     |

*n* = number of components of simplified sum scores; *r* = Spearman correlation coefficient between the simplified sum scores and the original principal component score

Supplementary data

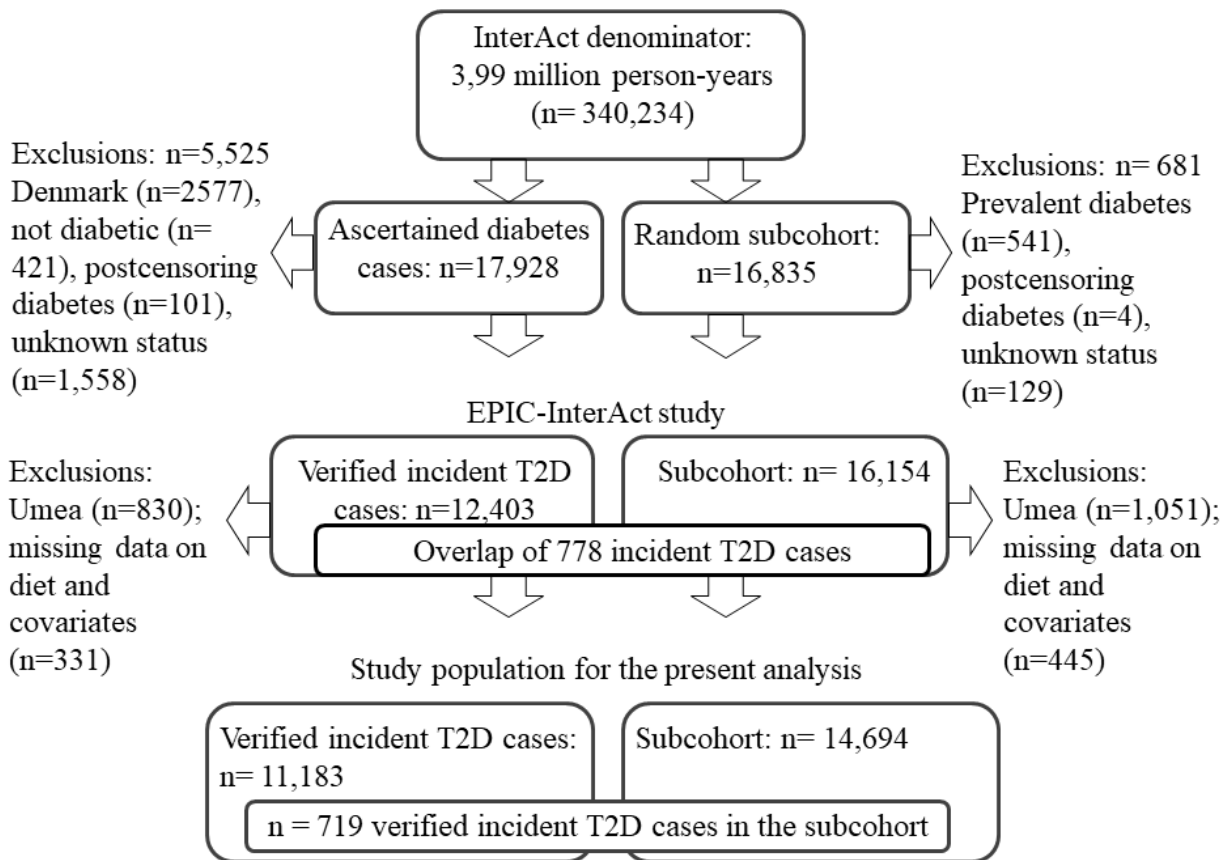

**Supplemental Figure 1 Scheme of the EPIC-InterAct case-cohort study and the present study population.** T2D, type 2 diabetes; InterAct denominator means all incident type 2 diabetes cases from EPIC countries (except for Norway and Greece) and a randomly drawn subcohort. From 455,680 eligible participants, those without stored blood samples ( $n=109,625$ ) and reported diabetes status ( $n=5,821$ ) were excluded, resulting in 340,234 participants.

Supplementary data

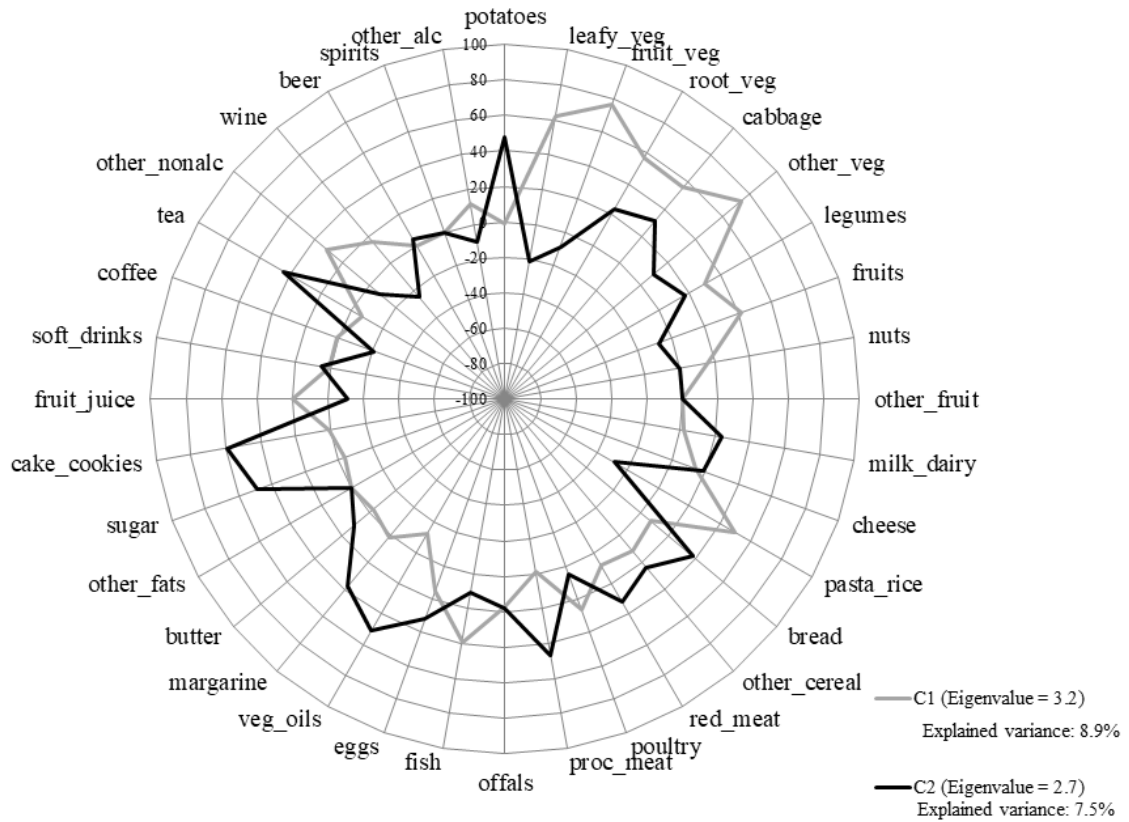

**Supplemental Figure 2 Dietary patterns derived in the subcohort of the center UK-Norfolk ( $n = 900$ )**  
 Factor loadings (ranging from -100 to 100) of the 36 included food groups on the two principal components (C1 and C2) are depicted in the spider graph.

Supplementary data

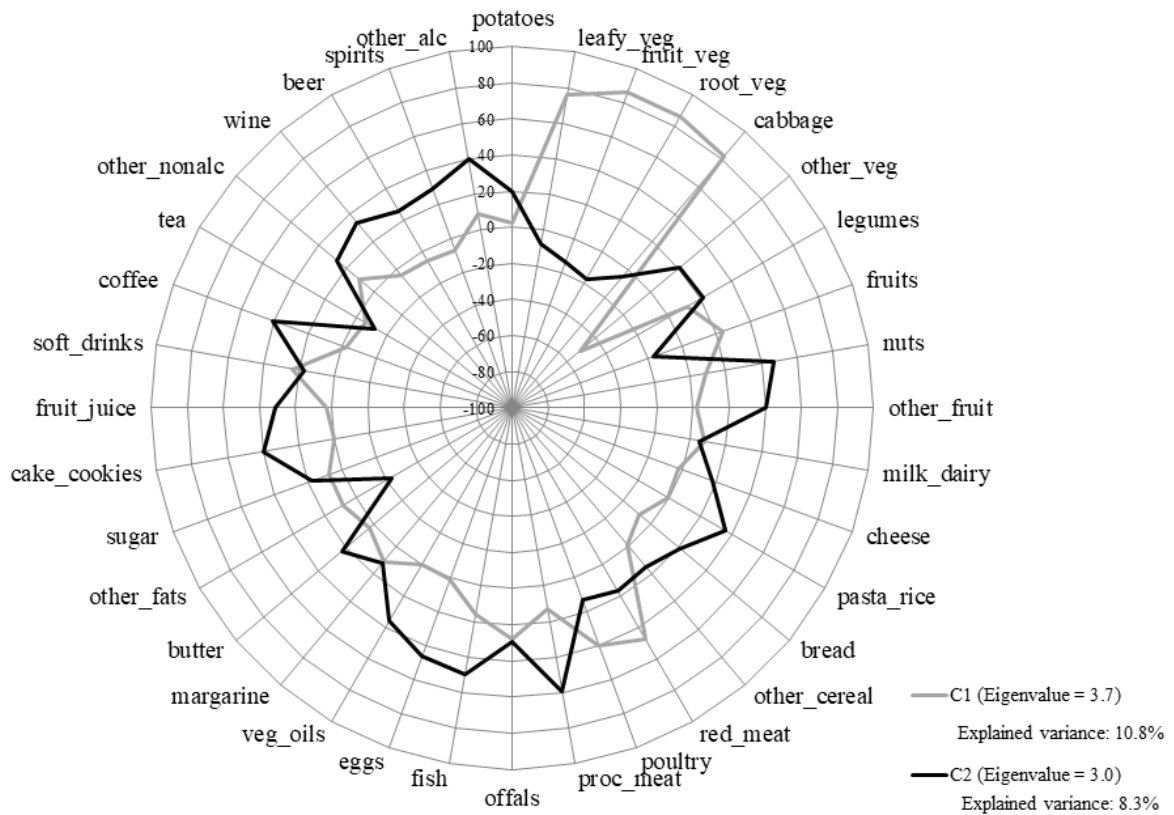

**Supplemental Figure 3 Dietary patterns derived in the French subcohort ( $n = 562$ )**

Factor loadings (ranging from -100 to 100) of the 36 included food groups on the two principal components (C1 and C2) are depicted in the spider graph.

Supplementary data

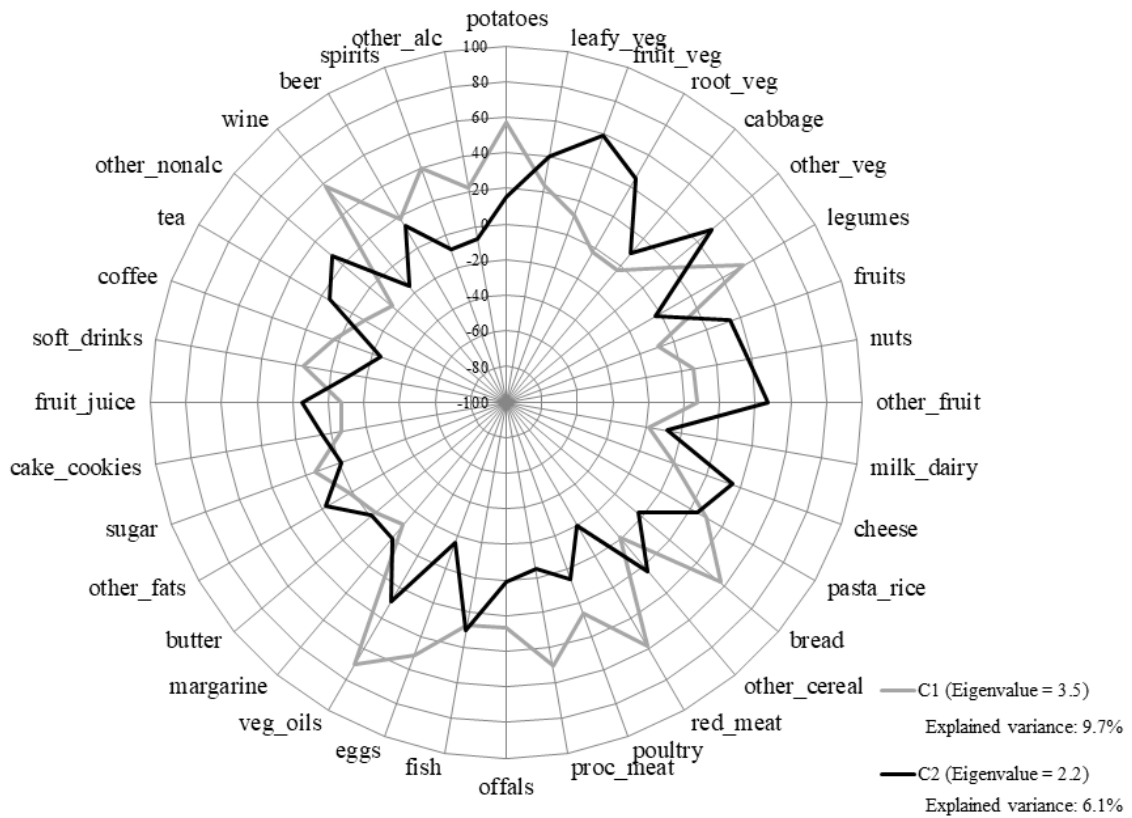

**Supplemental Figure 4 Dietary patterns derived in the Spanish subcohort ( $n = 3,509$ )**

Factor loadings (ranging from -100 to 100) of the 36 included food groups on the two principal components (C1 and C2) are depicted in the spider graph.

Supplementary data

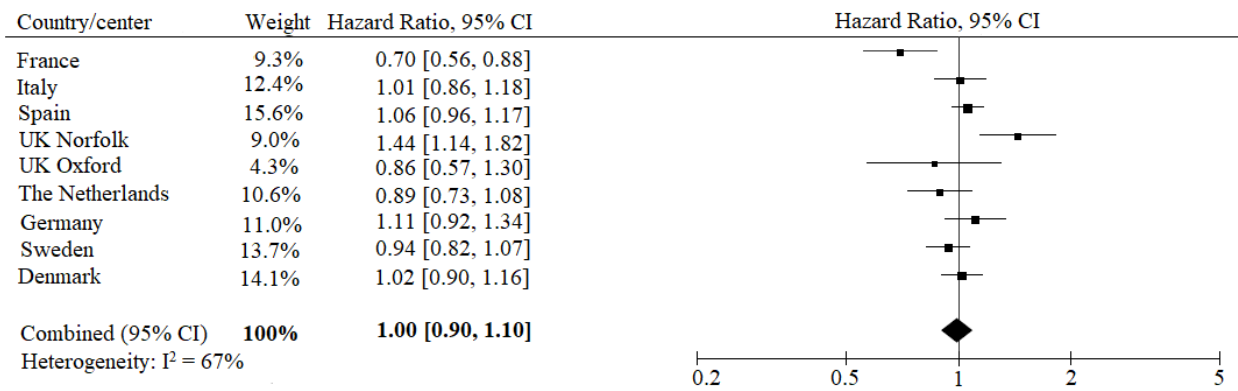

**Supplemental Figure 5** Meta-analysis of the hazard ratios and 95%-confidence intervals for the risk of type 2 diabetes per 1 SD of the ‘Replicative France’ score across all EPIC-InterAct countries



Supplementary data

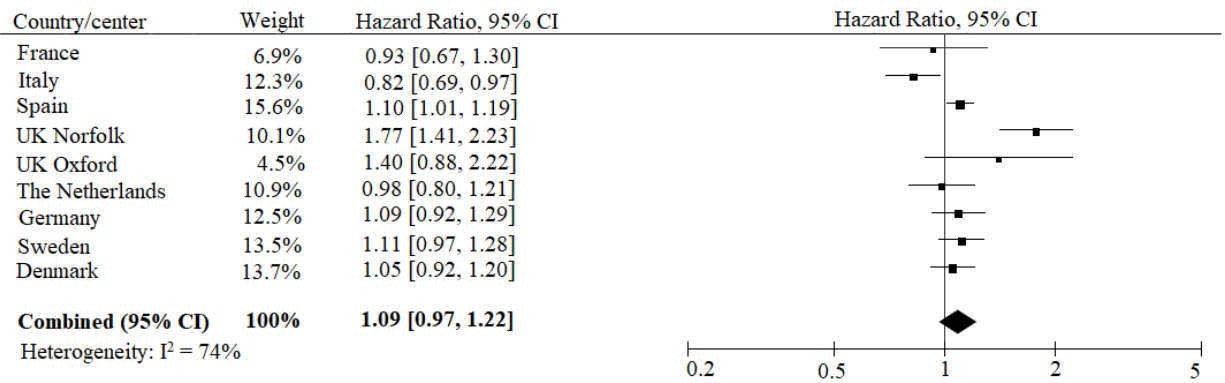

**Supplemental Figure 6** Meta-analysis of the hazard ratios and 95%-confidence intervals for the risk of type 2 diabetes per 1 SD of the ‘Simple Spain’ score across all EPIC-InterAct countries
